# Supplementary material for: Trachyspermum ammi Bioactives Promote Neuroprotection by Inhibiting Acetylcholinesterase, Aβ-Oligomerization/Fibrilization, and Mitigating Oxidative Stress In Vitro
Source: MDPI journal article supplement (doi:10.3390/antiox13010009), 2023-12-20

## Supplementary Information

**Supplementary Figure S1:** Phytoconstituents identified in (A) Carom-H and (B) Carom-EA extracts using gas chromatography-mass spectrometry.

**A**

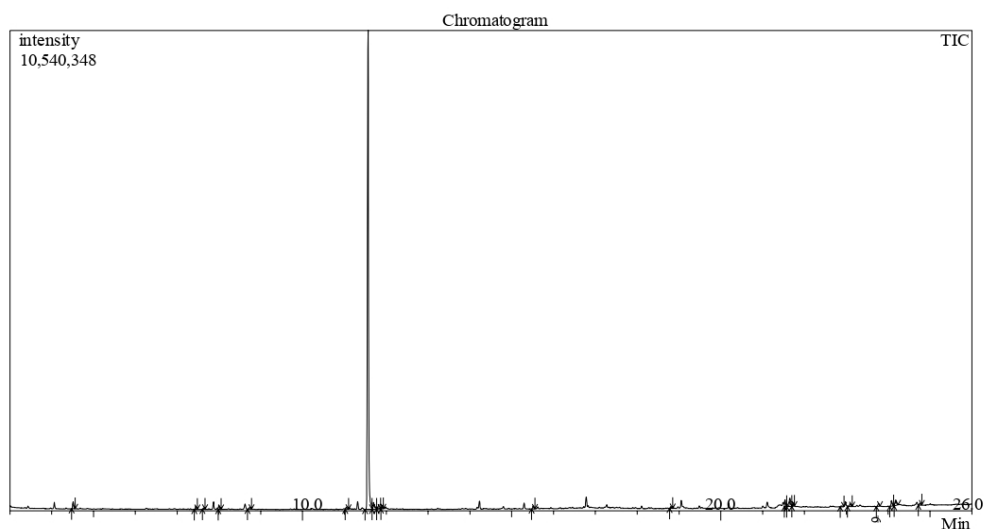

**Peak Report TIC**

| R.Time        | Area            | Area (%)     | Height          | Height (%)   | Name                                          |
|---------------|-----------------|--------------|-----------------|--------------|-----------------------------------------------|
| 4.513         | 263192          | 1.11         | 149690          | 1.24         | Benzene, chloro-                              |
| 7.445         | 115900          | 0.49         | 70597           | 0.59         | Benzene, 1-methyl-3-(1-methylethyl)-          |
| 7.629         | 41009           | 0.17         | 25616           | 0.21         | Benzene, 1,2-dichloro-                        |
| 8.000         | 149597          | 0.63         | 91071           | 0.76         | .gamma.-Terpinene                             |
| 8.736         | 104708          | 0.44         | 47184           | 0.39         | 5-Isopropyl-2-methylbicyclo[3.1.0]hexan-2-    |
| 11.046        | 82769           | 0.35         | 47811           | 0.40         | Thymoquinone                                  |
| <b>11.564</b> | <b>20539763</b> | <b>86.42</b> | <b>10504637</b> | <b>87.17</b> | <b>Phenol, 2-methyl-5-(1-methylethyl)-</b>    |
| 11.697        | 431002          | 1.81         | 145665          | 1.21         | (3-Fluorophenyl)carbanic acid, 2-isopropyl-   |
| 11.825        | 93982           | 0.40         | 27016           | 0.22         | 2-Isopropyl-5-methyl-1-heptanol               |
| 11.909        | 49560           | 0.21         | 29573           | 0.25         | Cyclopropane, 1-(1-hydroxy-1-heptyl)-2-met    |
| 15.513        | 120670          | 0.51         | 67246           | 0.56         | 2,2,4-Trimethyl-1,3-pentanediol diisobutyrat  |
| 18.804        | 64790           | 0.27         | 37489           | 0.31         | 3-Benzylsulfonyl-2,6,6-trimethylbicyclo(3.1.  |
| 21.536        | 259757          | 1.09         | 149182          | 1.24         | (E)-9-Octadecenoic acid ethyl ester           |
| 21.651        | 408067          | 1.72         | 184389          | 1.53         | Vinyltriphenylphosphonium bromide             |
| 21.715        | 78110           | 0.33         | 37508           | 0.31         | Phenol, 4,4'-(1-methylethylidene)bis-         |
| 22.870        | 73686           | 0.31         | 16741           | 0.14         | 2-Oxepanone, 7-hexyl-                         |
| 23.089        | 168575          | 0.71         | 77350           | 0.64         | 2H-Pyran, 2-(2-heptadecynyloxy)tetrahydro-    |
| 23.774        | 138516          | 0.58         | 64783           | 0.54         | 9-Octadecenoic acid, 1,2,3-propanetriyl ester |
| 24.083        | 220914          | 0.93         | 120209          | 1.00         | 1,2-Propanediol, 3-benzyloxy-1,2-diacetyl-    |
| 24.179        | 279529          | 1.18         | 114852          | 0.95         | Glycidyl oleate                               |
| 24.761        | 83299           | 0.35         | 42202           | 0.35         | Triphenylphosphine oxide                      |
|               | 23767395        | 100.00       | 12050811        | 100.00       |                                               |

# B

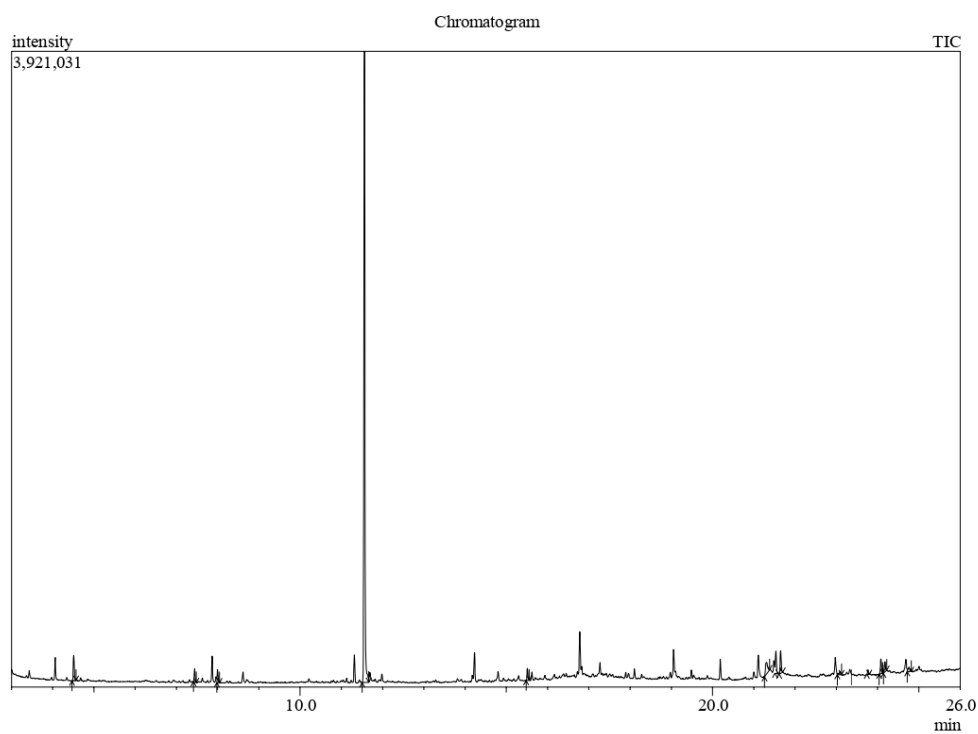

## Peak report

| R.Time        | Area           | Area (%)     | Height         | Height (%)   | Name                                         |
|---------------|----------------|--------------|----------------|--------------|----------------------------------------------|
| 4.511         | 268416         | 3.00         | 156710         | 3.23         | Benzene, chloro-                             |
| 7.442         | 133611         | 1.49         | 82239          | 1.69         | Benzene, 1-methyl-3-(1-methylethyl)-         |
| 7.998         | 129334         | 1.45         | 79561          | 1.64         | ,gamma.-Terpinene                            |
| <b>11.559</b> | <b>7060317</b> | <b>78.88</b> | <b>3892203</b> | <b>80.15</b> | <b>Phenol, 2-methyl-5-(1-methylethyl)-</b>   |
| 15.511        | 126344         | 1.41         | 73524          | 1.51         | Pentanoic acid, 2,2,4-trimethyl-3-carboxyiso |
| 21.305        | 274490         | 3.07         | 72409          | 1.49         | cis-9-Hexadecenal                            |
| 21.535        | 242211         | 2.71         | 136823         | 2.82         | cis-9-Octadecenoic acid, propyl ester        |
| 21.650        | 257608         | 2.88         | 137987         | 2.84         | Vinyltriphenylphosphonium bromide            |
| 23.087        | 44584          | 0.50         | 19728          | 0.41         | 2H-Pyran, 2-(2-heptadecyloxy)tetrahydro-     |
| 23.770        | 45230          | 0.51         | 28189          | 0.58         | trans-9-Octadecenoic acid, pentyl ester      |
| 24.082        | 173660         | 1.94         | 91336          | 1.88         | 1,2-Propanediol, 3-benzyloxy-1,2-diacetyl-   |
| 24.179        | 127538         | 1.42         | 61769          | 1.27         | Glycidyl oleate                              |
| 24.761        | 67044          | 0.75         | 23834          | 0.49         | Triphenylphosphine oxide                     |
|               | 8950387        | 100.00       | 4856312        | 100.00       |                                              |

**Supplementary Figure S2:** A $\beta$ -Oligomerization inhibition in the presence of Carom extracts, Carvacrol, and Thymol. The signal intensity of A $\beta$  oligomers at 0, 2, and 4 h. All data are expressed as mean  $\pm$  SEM ( $n = 3$ ). A significant difference \*\* ( $p < 0.01$ ) using two-way ANOVA followed by Dunnett's posthoc was observed in the oligomerization reduction vs. the negative control (Buffer + A $\beta$ ).

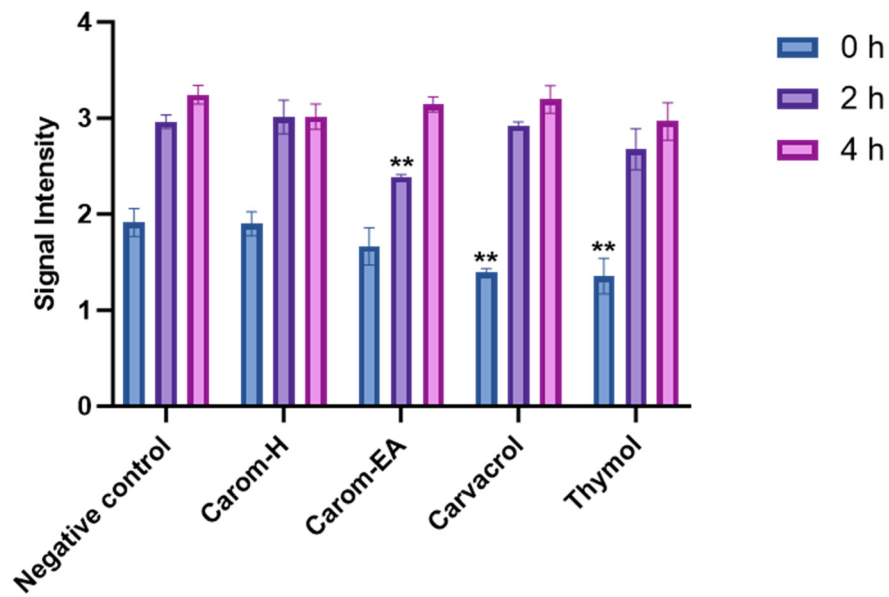

**Supplementary Figure S3:** Cytotoxicity assay of Carom extracts, Carvacrol, and Thymol on the SH-SY5Y cells. The cells were treated with varying concentrations (1, 10, 25, and 50  $\mu\text{g/ml}$ ) of extract/bioactive for 24 h. The absorbance values (Y-axis) were plotted against concentration (X-axis). The data were expressed as mean  $\pm$  SD ( $n = 3$ ). A significant difference \* ( $p < 0.05$ ) was observed using one-way ANOVA followed by Dunnett's post-hoc.

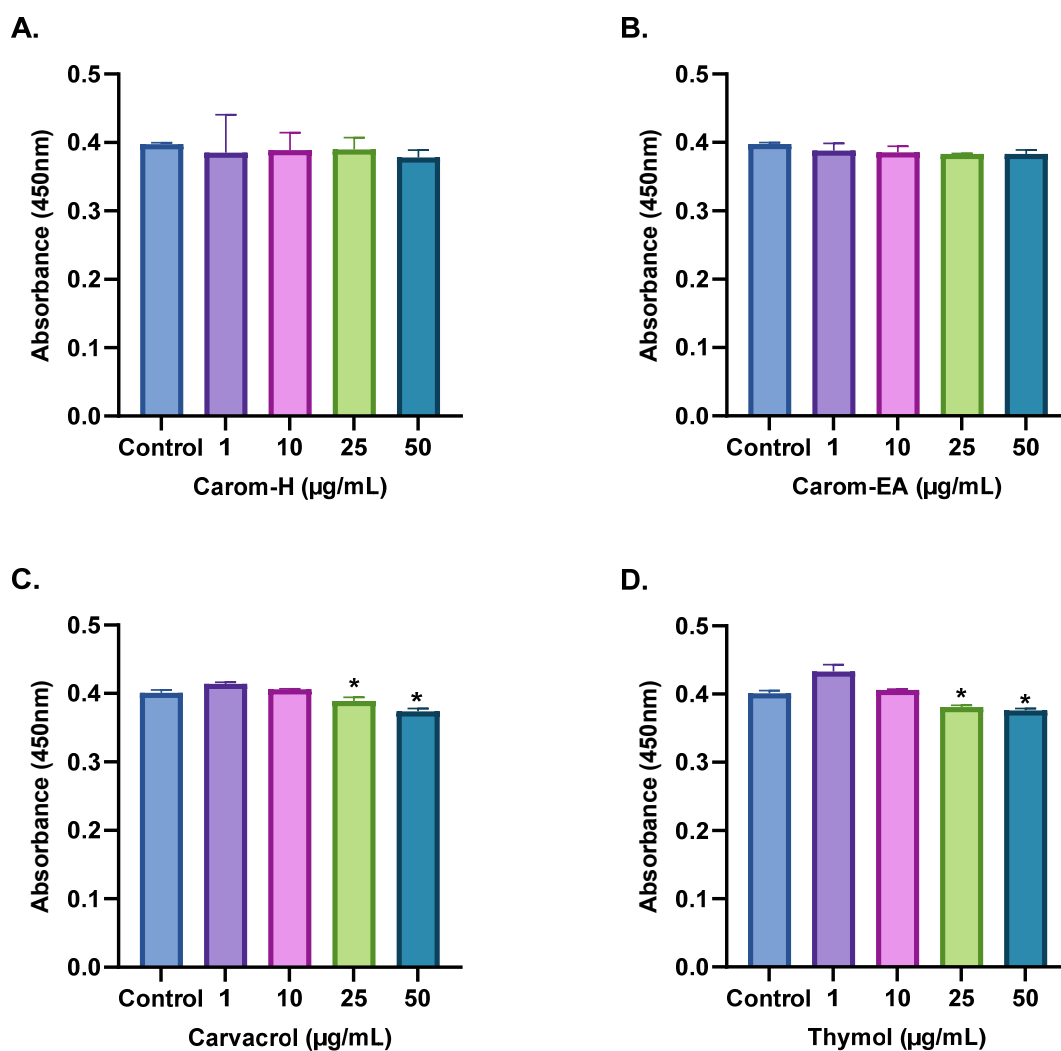

**Supplementary Figure S4:** Neuroprotective effect of Carom extracts, Carvacrol, and Thymol in H<sub>2</sub>O<sub>2</sub>-induced oxidative stress in neuroblastoma SH-SY5Y cells. The SH-SY5Y cells were pre-treated with various concentrations of the extract/bioactives (0.1, 1, 10, and 50 µg/ml) for 12 h followed by 6 h of H<sub>2</sub>O<sub>2</sub> (100 µM) treatment. The absorbance values (Y-axis) were plotted against concentration (X-axis). The data were expressed as mean  $\pm$  SD ( $n = 3$ ). A significant difference <sup>\*/#</sup> ( $p < 0.05$ ), <sup>\*\*/#</sup> ( $p < 0.01$ ), and <sup>\*\*\*\*/####</sup> ( $p < 0.0001$ ) using one-way ANOVA followed by Dunnett's test was observed in the treated vs untreated (control) cells (\*) and H<sub>2</sub>O<sub>2</sub> treated cells (#).

**A.**

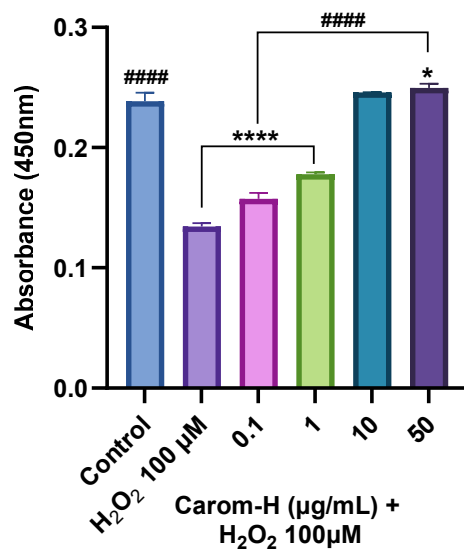

**B.**

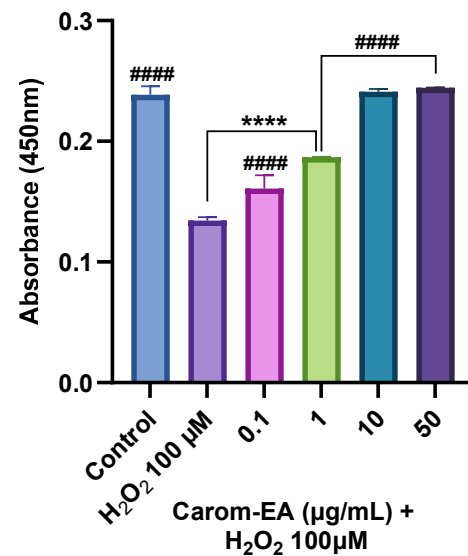

**C.**

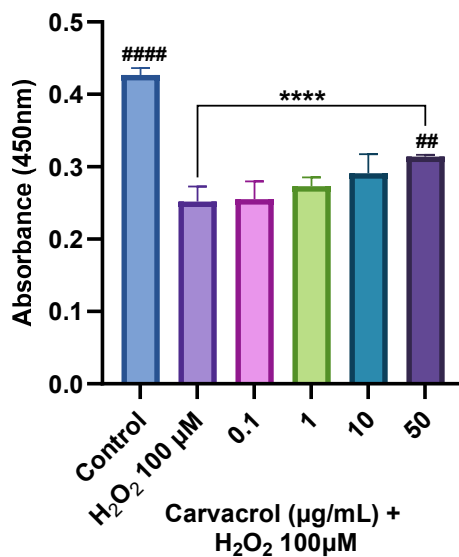

**D.**

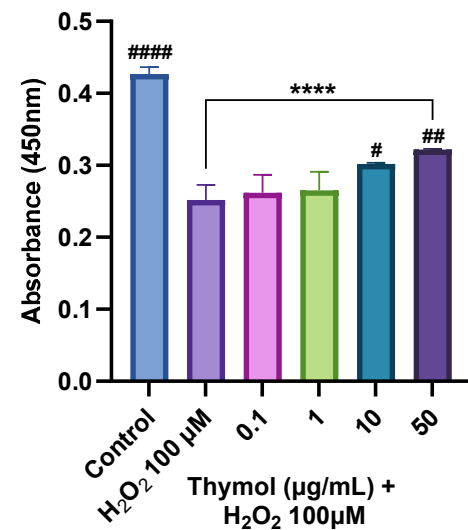

**Supplementary Figure S5:** Effect of Carom extracts, Carvacrol, and Thymol on H<sub>2</sub>O<sub>2</sub>-induced ROS production in SH-SY5Y cells. The SH-SY5Y cells were pre-incubated for 12 h with varying concentrations (1, 10, 25, and 50 µg/ml) of the extracts/bioactives followed by 4h H<sub>2</sub>O<sub>2</sub> (100 µM) exposure. The fluorescence values (Y-axis) were plotted against concentration (X-axis). The data were expressed as mean  $\pm$  SD ( $n = 3$ ). The data analysis was performed by One-way ANOVA followed by Dunnett's test. A significant difference \*/# ( $p < 0.05$ ), \*\*/## ( $p < 0.01$ ), \*\*\*/### ( $p < 0.001$ ), and \*\*\*\*/#### ( $p < 0.0001$ ) was observed in the treated vs untreated (control) cells (\*) and H<sub>2</sub>O<sub>2</sub> treated cells (#).

**A.**

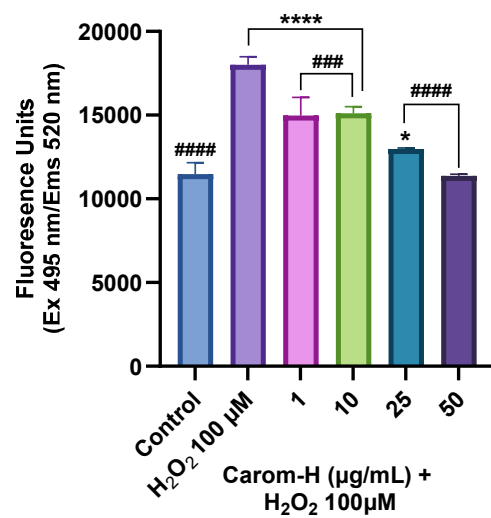

**B.**

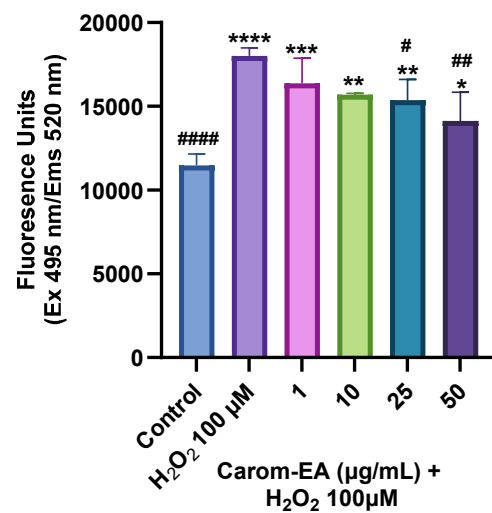

**C.**

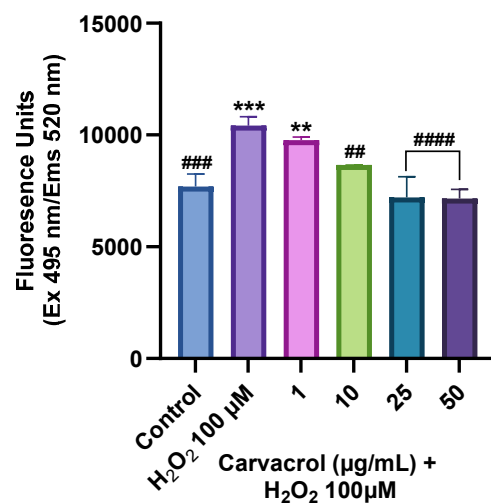

**D.**

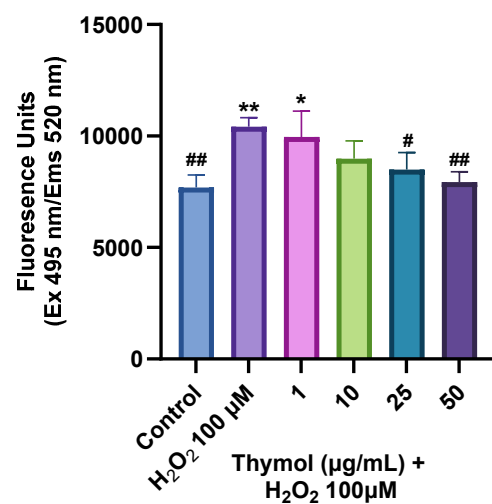

**Supplementary Figure S6:** Mitochondrial membrane potential in SH-SY5Y cells exposed to 200  $\mu\text{M}$   $\text{H}_2\text{O}_2$  for 2 h after 12 h pre-treatment with Carom extracts (1, 10, 25, and 50  $\mu\text{g}/\text{mL}$ ) and the pure compounds (0.1, 1, 10 and 25  $\mu\text{g}/\text{mL}$ ). The results were expressed as mean  $\pm$  SD ( $n = 3$ ). The fluorescence values (Y-axis) were plotted against concentration (X-axis). The data analysis was performed by One-way ANOVA followed by Dunnett's test. A significant difference  $^{*/\#}$  ( $p < 0.05$ ),  $^{**/\#\#}$  ( $p < 0.01$ ),  $^{***/\###}$  ( $p < 0.001$ ), and  $^{****/\####}$  ( $p < 0.0001$ ), was observed in the treated vs untreated (control) cells (\*) and  $\text{H}_2\text{O}_2$  treated cells (#). Abbreviation:  $\Delta\Psi\text{m}$ : Mitochondrial membrane potential.

A.

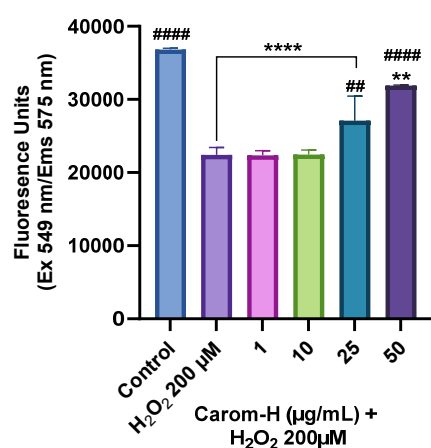

B.

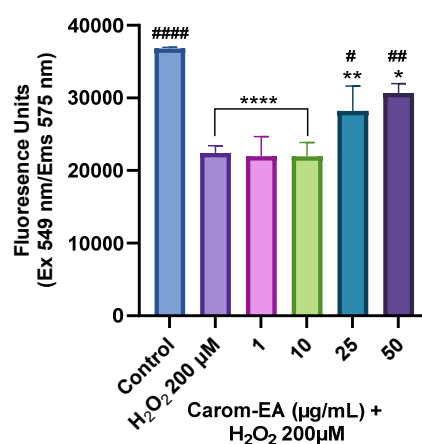

C.

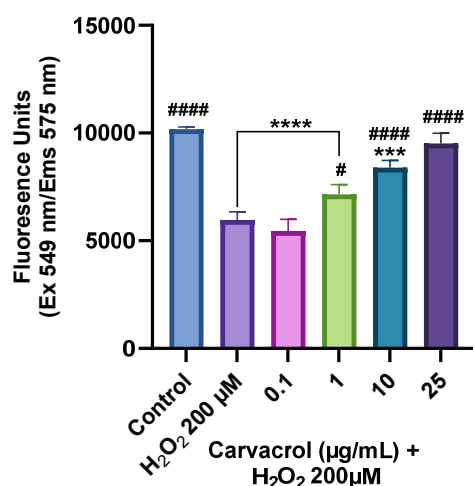

D.

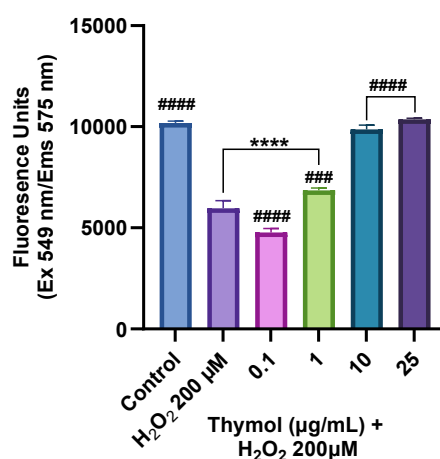

Supplement: s1 [file s1]
